# Supplementary material for: Dielectric switching, SHG response and Pd(ii) adsorption of a multifunctional phase-transition complex
Source: Royal Society of Chemistry journal article supplement (doi:10.1039/d1qi01017d), 2021-01-01
Supplement: d1qi01017d1.pdf [file d1qi01017d1.pdf]

## Supporting Information

### Dielectric Switching, SHG Response and Pd(II) Adsorption of Multifunctional Phase-transition Complex

Yu-Zhen Wang, Ping-Ping Shi, Ke Xu, Lei He, Xin Meng, Qiong Ye\*

#### EXPERIMENTAL SECTION

**Synthesis of 1.** The commercially available chemicals and reagents were of analytical grade, which can be used directly without any further purification. N-(2-Hydroxyethyl)thiomorpholine hydrochloric ( $[(C_2H_4OH)C_4H_9NS]Cl$ ) was synthesized by adding Thiomorpholine (4.014 mL, 40 mmol) and 2-bromoethanol (2.834 mL, 40 mmol) respectively into anhydrous acetonitrile (50 mL) at room temperature. The mixed solution was stirred at 343 K for one day. A pink crystalline solid was gradually separated out by cooling to 273 K and the yield was 59.65%.  $^1H$  NMR (DMSO):  $\delta$  3.75-3.77 (t, 1.96H),  $\delta$  3.41 (s, 8.04H),  $\delta$  3.21-3.29 (m, 2.01H),  $\delta$  2.85-2.87 (t, 1.00H). Then, the aqueous solution of N-(2-Hydroxyethyl)thiomorpholine hydrobromide (24 mmol, 5.472 g) and  $Ag_2CO_3$  (12 mmol, 3.309 g) were stirred for half an hour in the dark. Filtering and then adding hydrochloric acid (37%, 2.08 mL) to the filtrate. The mixed solution was stirred at room temperature for 30 minutes. The product salt N-(2-Hydroxyethyl)thiomorpholine hydrochloric was obtained as a white solid by adopting rotary evaporation under vacuum and then recrystallized from a mixed solvent (ethanol/ethyl acetate 1/10). The colorless block crystals of  $[(C_2H_4OH)C_4H_9NS]CdCl_3$  were gained by slowly evaporating the aqueous solution (50 mL) containing  $CdCl_2$  (4 mmol, 0.7332 g) and  $[(C_2H_4OH)C_4H_9NS]Cl$  (4 mmol, 0.7340 g) at room temperature over one week.

**Synthesis of 1-Pd.** The colorless  $[(C_2H_4OH)C_4H_9NS]CdCl_3$  (2.00 mmol, 0.734 g) was put into a saturated dichloromethane solution of  $[PdCl_2(CH_3CN)_2]$  (0.5188 g, 2 mmol) for a week at room temperature. The crystals become nut-brown after adsorbing most of Pd(II) ions in the solution. Complex **1** demonstrated its adsorption properties by measuring inductively coupled plasma (ICP) and the elemental analysis shows that the molar ratio of Pd/S was 0.236. And the melting point of **1-Pd** is approximately 450 K.

#### Characterizations.

**Phase Purity.** The phase purity of  $[(C_2H_4OH)C_4H_9NS]^+$  can be confirmed by the mass spectrum with liquid chromatography/time-of-flight mass spectrometry. The powder X-ray diffraction (PXRD) analysis of **1** and **1-Pd** were performed on Rigaku Ultima IV multipurpose X-ray Diffractometer at 293 K. The diffraction pattern is obtained in the range of  $2\theta$  ( $5 \sim 50^\circ$ ) with a step size of  $0.02^\circ$ . Infrared (IR) spectroscopy was employed on a Shimadzu model IR-60 spectrometer.

**Single-Crystal X-ray Diffraction (SCXRD).** The single-crystal X-ray diffraction of **1** at 293 K and 100 K were obtained on Rigaku Saturn 924 diffractometer with Mo  $K\alpha$  radiation ( $\lambda = 0.71073 \text{ \AA}$ ). The data were processed with the CrystalClear software package. The structures of **1** were solved by direct methods and refined with the SHELXTL software package which used full-matrix least-squares methods based on  $F^2$  data. The anisotropic refinement of all non-H atoms was performed, and the positions of all H atoms were geometrically generated. The crystallographic data and the details of structure refinement are listed in Table S1. CCDC 2082243 (293 K, **1**) and 2082244 (100 K, **1**) contain the supplementary crystallographic data for this paper. These data are provided free of charge by The Cambridge Crystallographic Data Centre.

**Thermogravimetric Analysis (TGA).** Thermogravimetric analysis of compound **1** was performed on a Netzsch Model TG 209F1 instrument. The measurements were collected in nitrogen flow from 304 K to 1050 K, and the result shows that the sample begins to decompose at 506 K.

**DSC Measurements.** Differential scanning calorimetry (DSC) of **1** and **1-Pd** were measured on PerkinElmer Diamond DSC instrument that 20.4 mg (**1**) and 20.0 mg (**1-Pd**) powder samples were placed in aluminum crucibles with heating and cooling rates of 20 K/min under nitrogen atmosphere.

**Dielectric Measurements.** The dielectric responses of **1** and **1-Pd** were performed on Tonghui Model TH2828A impedance analyzer. The powder-pressed pellets of about 2-3 mm pasted with silver or carbon conducting glue were used in dielectric

measurements. The temperature-dependent dielectric constants were measured on a Tonghui Model TH2828A impedance analyzer at the frequencies of 1 MHz, with an applied ac voltage at 1 V. During the experiment, the heating process is completed by heating furnace, and the cooling is completed by liquid nitrogen.

**Second Harmonic Generation (SHG).** Second harmonic generation of complex **1** was measured by using a low divergence unexpanded laser beam with low divergence (pulsed Nd:YAG at a wavelength of 1064 nm) on an FLS 920, Edinburgh Instruments.

**Elemental Analysis.** For the elemental analysis, the regular elemental analysis was determined with Elementar vario EL III instrument. Inductively coupled plasma (ICP) elemental analysis was performed on Spectroblue ICP-OES. Combustion Ion Chromatography elemental analysis was performed on Thermo Scientific Nicolet IS10234

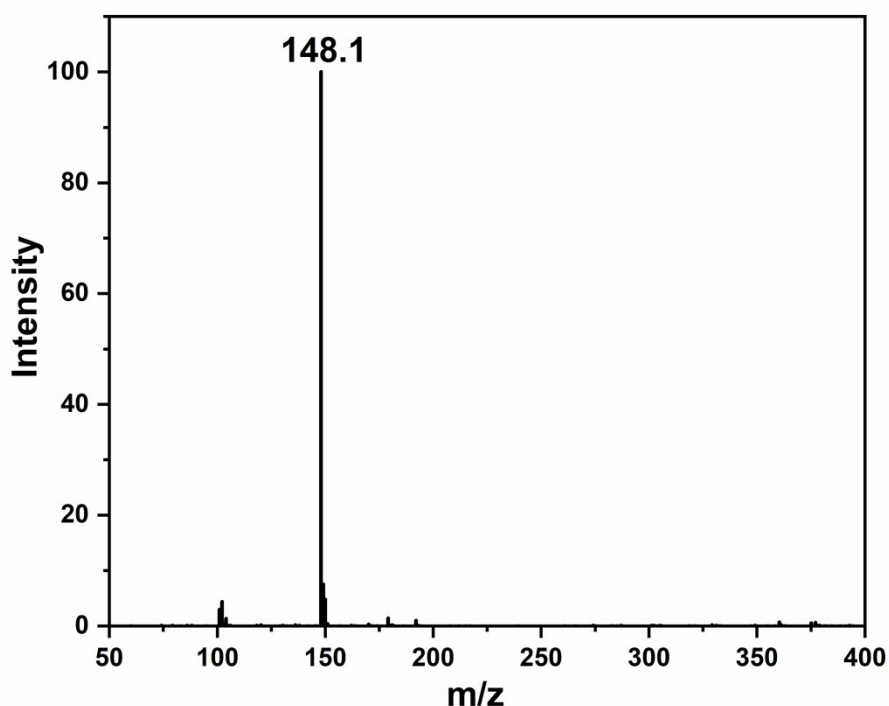

**Fig. S1** The mass spectrum of  $[(C_2H_4OH)C_4H_9NS]^+$

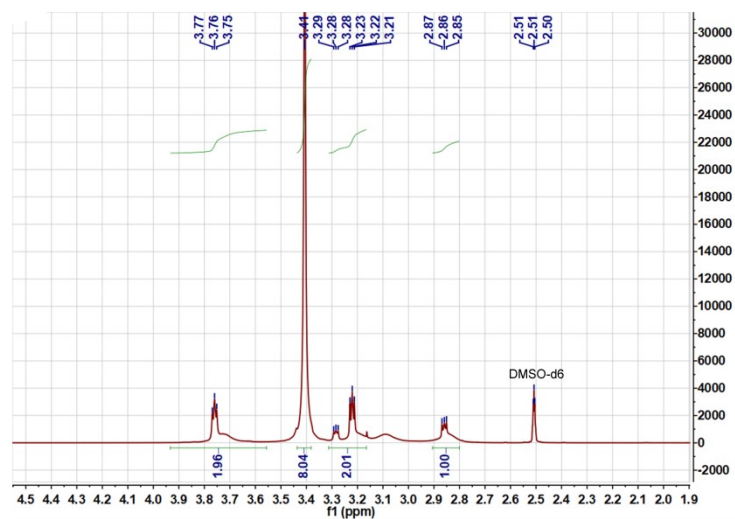

**Fig. S2** The <sup>1</sup>H-NMR of [(C<sub>2</sub>H<sub>4</sub>OH)C<sub>4</sub>H<sub>9</sub>NS]Br.

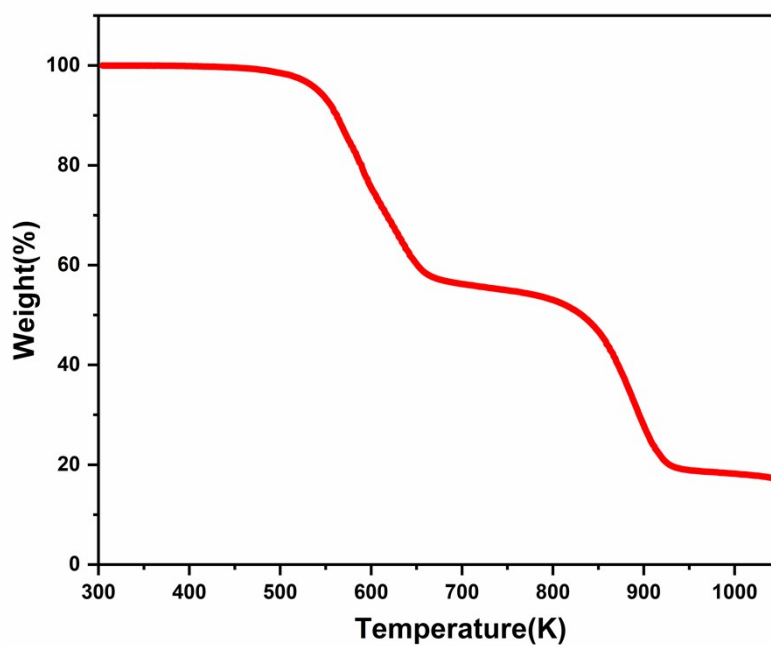

**Fig. S3** Thermogravimetric analysis (TGA) curve of compound **1**, showing the stability up to 506 K.

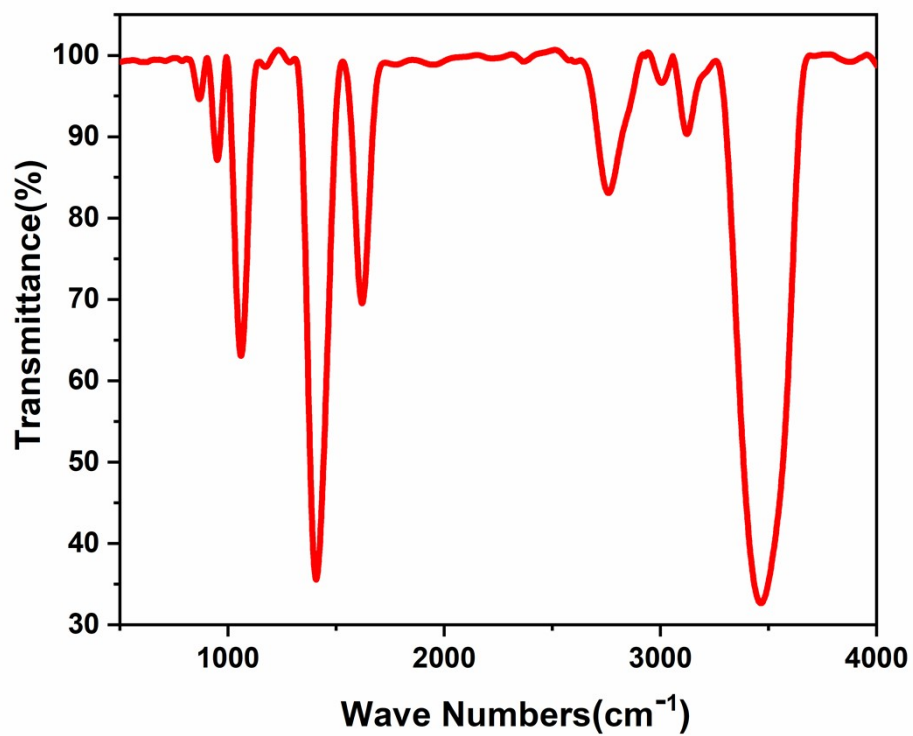

Fig. S4 IR spectrum of **1** measured on a KBr-diluted pellet at room temperature.

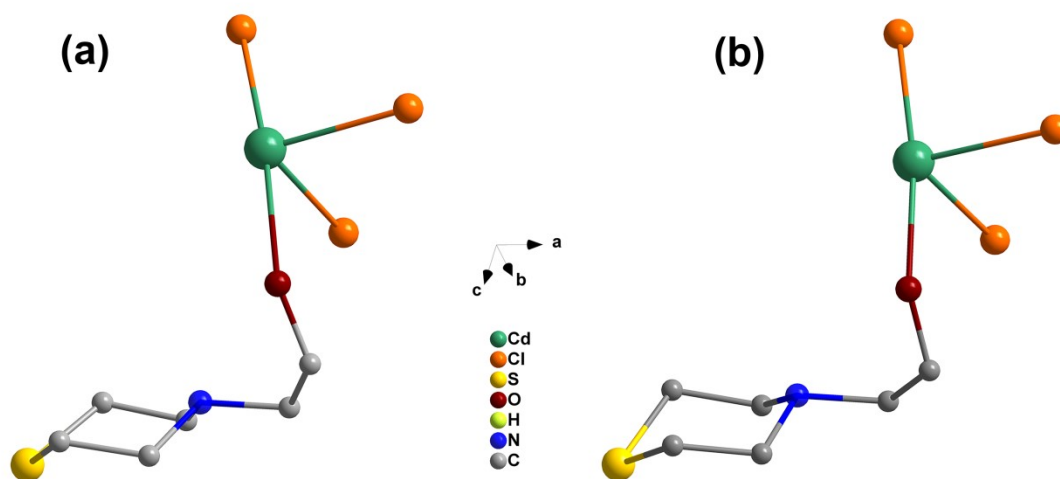

Fig. S5 The minimum asymmetric unit of **1** at RTP (a) and LTP (b).

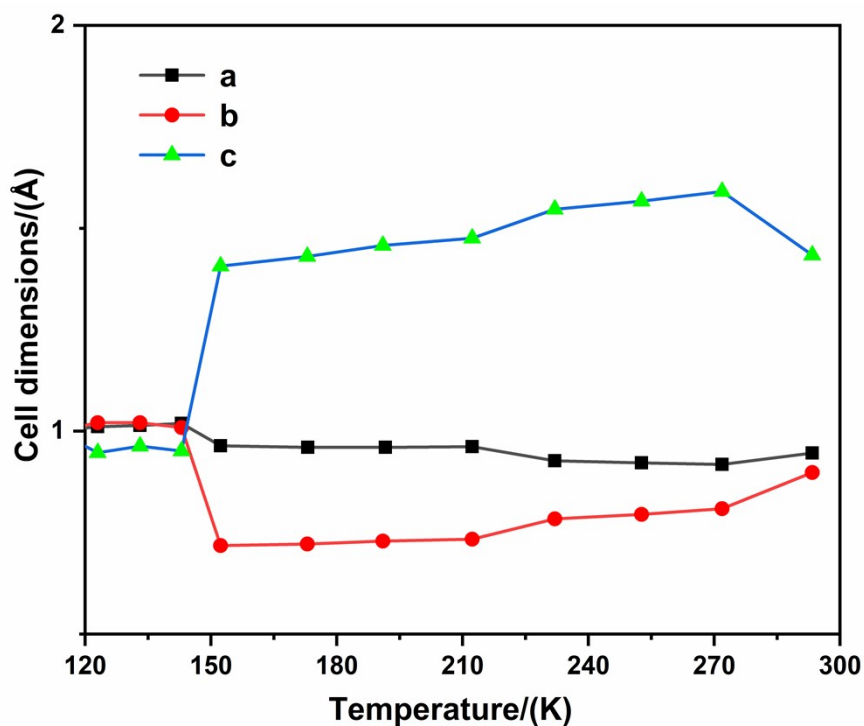

**Fig. S6** Temperature-dependent traces of the cell dimensions (a, b and c axes) all under the LT cell settings, and normalized over the dimensions at the lowest temperature points.

**Table S1.** Crystal data and structure refinement details of complex **1**.

| Chemical Formula         | [(C <sub>2</sub> H <sub>4</sub> OH)C <sub>4</sub> H <sub>9</sub> NS]CdCl <sub>3</sub> |                                                       |
|--------------------------|---------------------------------------------------------------------------------------|-------------------------------------------------------|
| <i>T</i> (K)             | 293 K                                                                                 | 100 K                                                 |
| Formula weight           | 367.00                                                                                | 367.00                                                |
| Crystal system           | Orthorhombic                                                                          | Orthorhombic                                          |
| Space group              | <i>P</i> 2 <sub>1</sub> 2 <sub>1</sub> 2 <sub>1</sub>                                 | <i>P</i> 2 <sub>1</sub> 2 <sub>1</sub> 2 <sub>1</sub> |
| <i>a</i> /Å              | 7.4184 (4)                                                                            | 7.4609 (5)                                            |
| <i>b</i> /Å              | 12.2626 (7)                                                                           | 12.4577 (7)                                           |
| <i>c</i> /Å              | 13.5510 (9)                                                                           | 12.9412 (7)                                           |
| $\alpha$ (deg)           | 90                                                                                    | 90                                                    |
| $\beta$ (deg)            | 90                                                                                    | 90                                                    |
| $\gamma$ (deg)           | 90                                                                                    | 90                                                    |
| <i>V</i> /Å <sup>3</sup> | 1232.72 (13)                                                                          | 1202.83 (12)                                          |
| <i>Z</i>                 | 4                                                                                     | 4                                                     |

|          |       |       |
|----------|-------|-------|
| $F(000)$ | 720.0 | 720.0 |
| GOF      | 1.02  | 1.06  |
| $R_1$    | 0.032 | 0.037 |
| $wR_2$   | 0.077 | 0.093 |

**Table S2.** The bond lengths and angles at 293 K.

| Bond lengths (Å)      |             | Bond angles (°)                        |              |
|-----------------------|-------------|----------------------------------------|--------------|
| Cd1—Cl3               | 2.5389 (14) | Cl3—Cd1—Cl1 <sup>i</sup>               | 95.17 (5)    |
| Cd1—Cl1 <sup>i</sup>  | 2.5802 (13) | Cl3—Cd1—Cl2                            | 93.25 (5)    |
| Cd1—Cl2               | 2.6016 (13) | Cl1 <sup>i</sup> —Cd1—Cl2              | 95.36 (4)    |
| Cd1—Cl1               | 2.6111 (13) | Cl3—Cd1—Cl1                            | 99.71 (5)    |
| Cd1—Cl2 <sup>i</sup>  | 2.6122 (13) | Cl1 <sup>i</sup> —Cd1—Cl1              | 164.89 (2)   |
| Cd1—O1                | 2.641 (4)   | Cl2—Cd1—Cl1                            | 86.44 (4)    |
| Cl1—Cd1 <sup>ii</sup> | 2.5802 (13) | Cl3—Cd1—Cl2 <sup>i</sup>               | 101.07 (5)   |
| Cl2—Cd1 <sup>ii</sup> | 2.6121 (13) | Cl1 <sup>i</sup> —Cd1—Cl2 <sup>i</sup> | 86.87 (4)    |
| S1—C5                 | 1.789 (8)   | Cl2—Cd1—Cl2 <sup>i</sup>               | 165.261 (16) |
| S1—C4                 | 1.825 (10)  | Cl1—Cd1—Cl2 <sup>i</sup>               | 87.71 (4)    |
| O1—C1                 | 1.422 (7)   | Cl3—Cd1—O1                             | 172.29 (9)   |
| N1—C2                 | 1.501 (8)   | Cl1 <sup>i</sup> —Cd1—O1               | 78.25 (9)    |
| N1—C6                 | 1.507 (7)   | Cl2—Cd1—O1                             | 83.47 (10)   |
| N1—C3                 | 1.509 (8)   | Cl1—Cd1—O1                             | 87.08 (9)    |
| C2—C1                 | 1.487 (9)   | Cl2 <sup>i</sup> —Cd1—O1               | 82.72 (10)   |
| C6—C5                 | 1.507 (9)   | Cd1 <sup>ii</sup> —Cl1—Cd1             | 93.09 (4)    |
| C3—C4                 | 1.469 (10)  | Cd1—Cl2—Cd1 <sup>ii</sup>              | 92.57 (4)    |
|                       |             | C5—S1—C4                               | 97.5 (4)     |
|                       |             | C1—O1—Cd1                              | 142.8 (4)    |
|                       |             | O1—C1—C2                               | 112.0 (5)    |
|                       |             | C2—N1—C6                               | 112.3 (4)    |
|                       |             | C2—N1—C3                               | 110.7 (5)    |

|          |           |
|----------|-----------|
| C6—N1—C3 | 112.0 (5) |
| C3—C4—S1 | 112.5 (5) |
| C1—C2—N1 | 112.7 (5) |
| N1—C6—C5 | 111.2 (5) |
| C6—C5—S1 | 113.4 (6) |
| C4—C3—N1 | 112.6 (6) |

**Table S3.** The bond lengths and angles at 100 K.

| <b>Bond lengths (Å)</b> |             | <b>Bond angles (°)</b>                   |            |
|-------------------------|-------------|------------------------------------------|------------|
| C11—Cd1 <sup>i</sup>    | 2.6146 (18) | Cl2—Cd1—Cl3                              | 94.72 (6)  |
| C11—Cd1                 | 2.6636 (19) | O1—Cd1—Cl2 <sup>ii</sup>                 | 86.46 (13) |
| Cl3—Cd1                 | 2.5776 (16) | Cl2—Cd1—Cl2 <sup>ii</sup>                | 168.93 (3) |
| Cd1—Cl2                 | 2.5742 (18) | Cl3—Cd1—Cl2 <sup>ii</sup>                | 94.64 (6)  |
| Cd1—Cl2 <sup>ii</sup>   | 2.5933 (18) | O1—Cd1—Cl1 <sup>ii</sup>                 | 80.91 (13) |
| Cd1—Cl1 <sup>ii</sup>   | 2.6147 (18) | Cl2—Cd1—Cl1 <sup>ii</sup>                | 99.18 (6)  |
| Cl2—Cd1 <sup>i</sup>    | 2.5933 (18) | Cl3—Cd1—Cl1 <sup>ii</sup>                | 90.49 (6)  |
| O1—Cd1                  | 2.445 (5)   | Cl2 <sup>ii</sup> —Cd1—Cl1 <sup>ii</sup> | 86.65 (6)  |
| C4—C3                   | 1.508 (11)  | O1—Cd1—Cl1                               | 89.31 (13) |
| C4—S1                   | 1.816 (8)   | Cl2—Cd1—Cl1                              | 86.02 (6)  |
| C5—C6                   | 1.489 (10)  | Cl3—Cd1—Cl1                              | 99.41 (5)  |
| C5—S1                   | 1.818 (7)   | Cl2 <sup>ii</sup> —Cd1—Cl1               | 86.62 (6)  |
| C3—N1                   | 1.513 (10)  | Cl1 <sup>ii</sup> —Cd1—Cl1               | 168.44 (4) |
| C6—N1                   | 1.501 (9)   | Cd1—Cl2—Cd1 <sup>i</sup>                 | 93.43 (5)  |
| N1—C2                   | 1.524 (10)  | C3—C4—S1                                 | 111.5 (5)  |
| C2—C1                   | 1.515 (10)  | C6—C5—S1                                 | 112.5 (5)  |
| C1—O1                   | 1.427 (8)   | C4—S1—C5                                 | 95.9 (4)   |
|                         |             | C4—C3—N1                                 | 111.7 (6)  |
|                         |             | C5—C6—N1                                 | 113.5 (6)  |



|                           |             |
|---------------------------|-------------|
| C6—N1—C3                  | 112.0 (6)   |
| C6—N1—C2                  | 112.6 (6)   |
| C3—N1—C2                  | 109.3 (6)   |
| C1—C2—N1                  | 112.6 (7)   |
| O1—C1—C2                  | 112.6 (6)   |
| C1—O1—Cd1                 | 135.5 (5)   |
| Cd1 <sup>i</sup> —Cl1—Cd1 | 90.90 (5)   |
| O1—Cd1—Cl2                | 85.19 (13)  |
| O1—Cd1—Cl3                | 171.26 (12) |

**Table S4.** The selected torsion angles [°] for **1** at 293 K and 100 K.

| Bond angles  | 293 K      | 100 K      |
|--------------|------------|------------|
| C6—N1—C2—C1  | -73.6 (7)  | -70.1 (8)  |
| C3—N1—C2—C1  | 160.4 (5)  | 164.8 (6)  |
| C2—N1—C6—C5  | 172.5 (5)  | 176.2 (6)  |
| C3—N1—C6—C5  | -62.3 (7)  | -60.2 (8)  |
| N1—C6—C5—S1  | 61.8 (7)   | 61.8 (7)   |
| C4—S1—C5—C6  | -53.0 (6)  | -55.5 (6)  |
| C2—N1—C3—C4  | -170.3 (6) | -173.1 (6) |
| C6—N1—C3—C4  | 63.6 (7)   | 61.4 (8)   |
| Cd1—O1—C1—C2 | -48.7 (9)  | -54.4 (10) |
| N1—C2—C1—O1  | -49.5 (7)  | -57.6 (9)  |
| N1—C3—C4—S1  | -61.9 (7)  | -64.7 (7)  |
| C5—S1—C4—C3  | 52.9 (6)   | 57.1 (6)   |

**Table S5.** Hydrogen bonds under 293 K for complex **1**.

| D—H···A                   | D—H  | H···A | D···A     | <DHA |
|---------------------------|------|-------|-----------|------|
| O1—H1A···Cl3 <sup>i</sup> | 0.93 | 2.34  | 3.118 (5) | 142  |
| N1—H1···Cl1 <sup>i</sup>  | 0.98 | 2.36  | 3.295 (5) | 160  |

|                            |      |      |           |     |
|----------------------------|------|------|-----------|-----|
| C2—H2B···Cl2               | 0.97 | 2.78 | 3.563 (7) | 138 |
| C2—H2A···Cl2 <sup>v</sup>  | 0.97 | 2.93 | 3.798 (7) | 150 |
| C4—H4B···Cl1 <sup>i</sup>  | 0.97 | 2.66 | 3.499 (8) | 145 |
| C4—H4A···S1 <sup>iii</sup> | 0.97 | 2.83 | 3.619 (9) | 139 |
| C4—H4A···Cl3 <sup>iv</sup> | 0.97 | 2.86 | 3.500 (7) | 125 |

**Table S6.** Hydrogen bonds under 100 K for complex 1.

| D—H···A                     | D—H  | H···A | D···A     | <DHA |
|-----------------------------|------|-------|-----------|------|
| O1—H1E···Cl1 <sup>ii</sup>  | 0.96 | 2.76  | 3.285 (5) | 115  |
| O1—H1E···Cl3 <sup>ii</sup>  | 0.96 | 2.29  | 3.081 (6) | 139  |
| N1—H1···Cl1 <sup>ii</sup>   | 0.98 | 2.34  | 3.179 (6) | 143  |
| C4—H4B···Cl1 <sup>ii</sup>  | 0.97 | 2.86  | 3.565 (8) | 131  |
| C5—H5A···Cl3 <sup>ii</sup>  | 0.97 | 2.88  | 3.525 (7) | 125  |
| C5—H5A···Cl2 <sup>iii</sup> | 0.97 | 2.98  | 3.872 (8) | 153  |
| C5—H5B···Cl1 <sup>iv</sup>  | 0.97 | 2.75  | 3.715 (8) | 176  |
| C6—H6A···Cl3 <sup>v</sup>   | 0.97 | 2.77  | 3.692 (8) | 159  |
| C6—H6A···Cl2 <sup>v</sup>   | 0.97 | 2.80  | 3.310 (7) | 113  |
| C6—H6B···Cl3 <sup>ii</sup>  | 0.97 | 2.85  | 3.431 (8) | 119  |
